# Supplementary material
Source: Springer Nature journal article supplement (https://www.springermedizin.de/resource/supplementary/13002_2008_118_MOESM3_ESM.pdf/9627204)

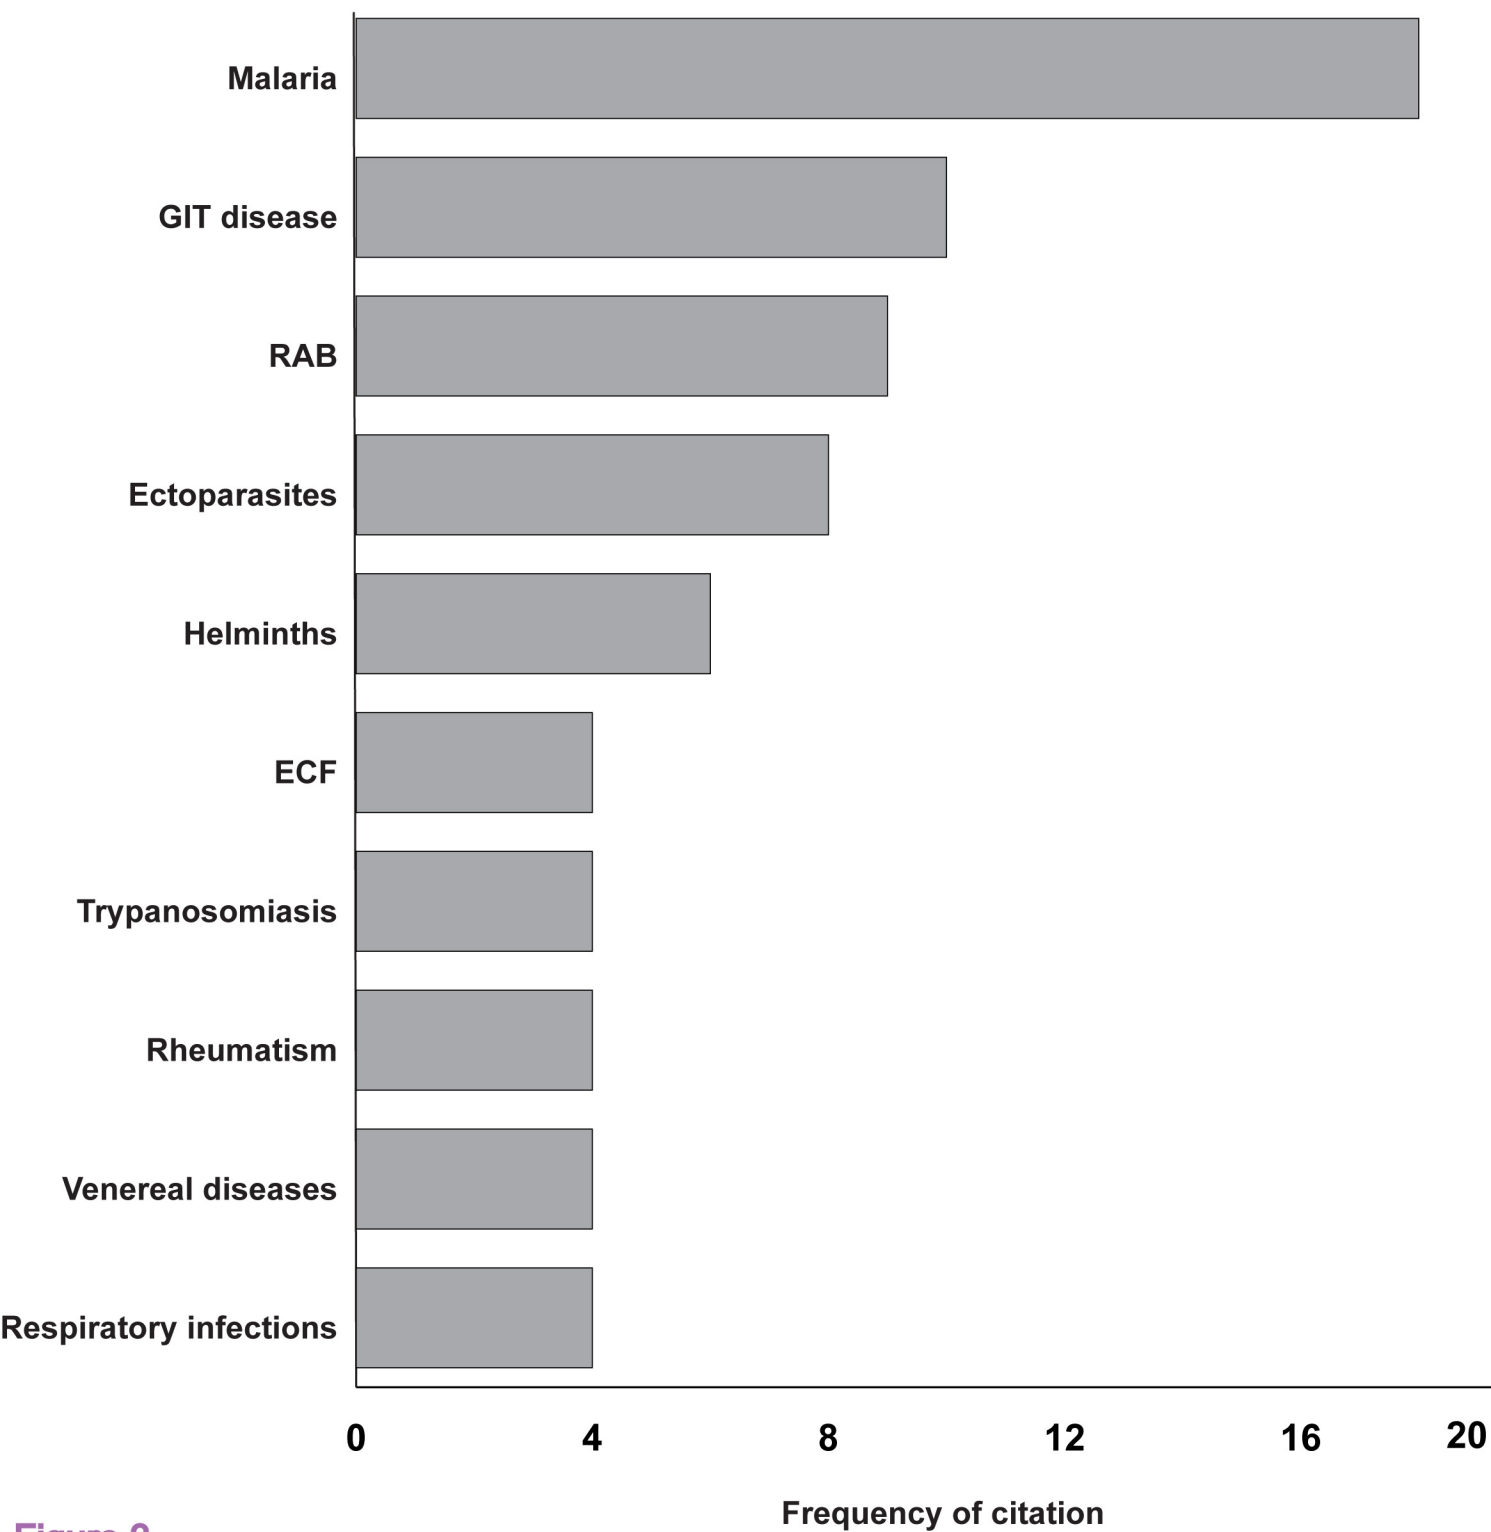

**Figure 3**

Supplement: MOESM3 [file 9627204]
